# Supplementary material for: Iron tolerance in rice: an efficient method for performing quick early genotype screening
Source: PubMed Central journal article supplement (PMC6593560; doi:10.1186/s13104-019-4362-5), 2019-06-25
Supplement: 13104_2019_4362_MOESM1_ESM.pdf [file 13104_2019_4362_MOESM1_ESM.pdf]

### (a) Shoot length of each genotype

based on the values of each repetition used in figure 2

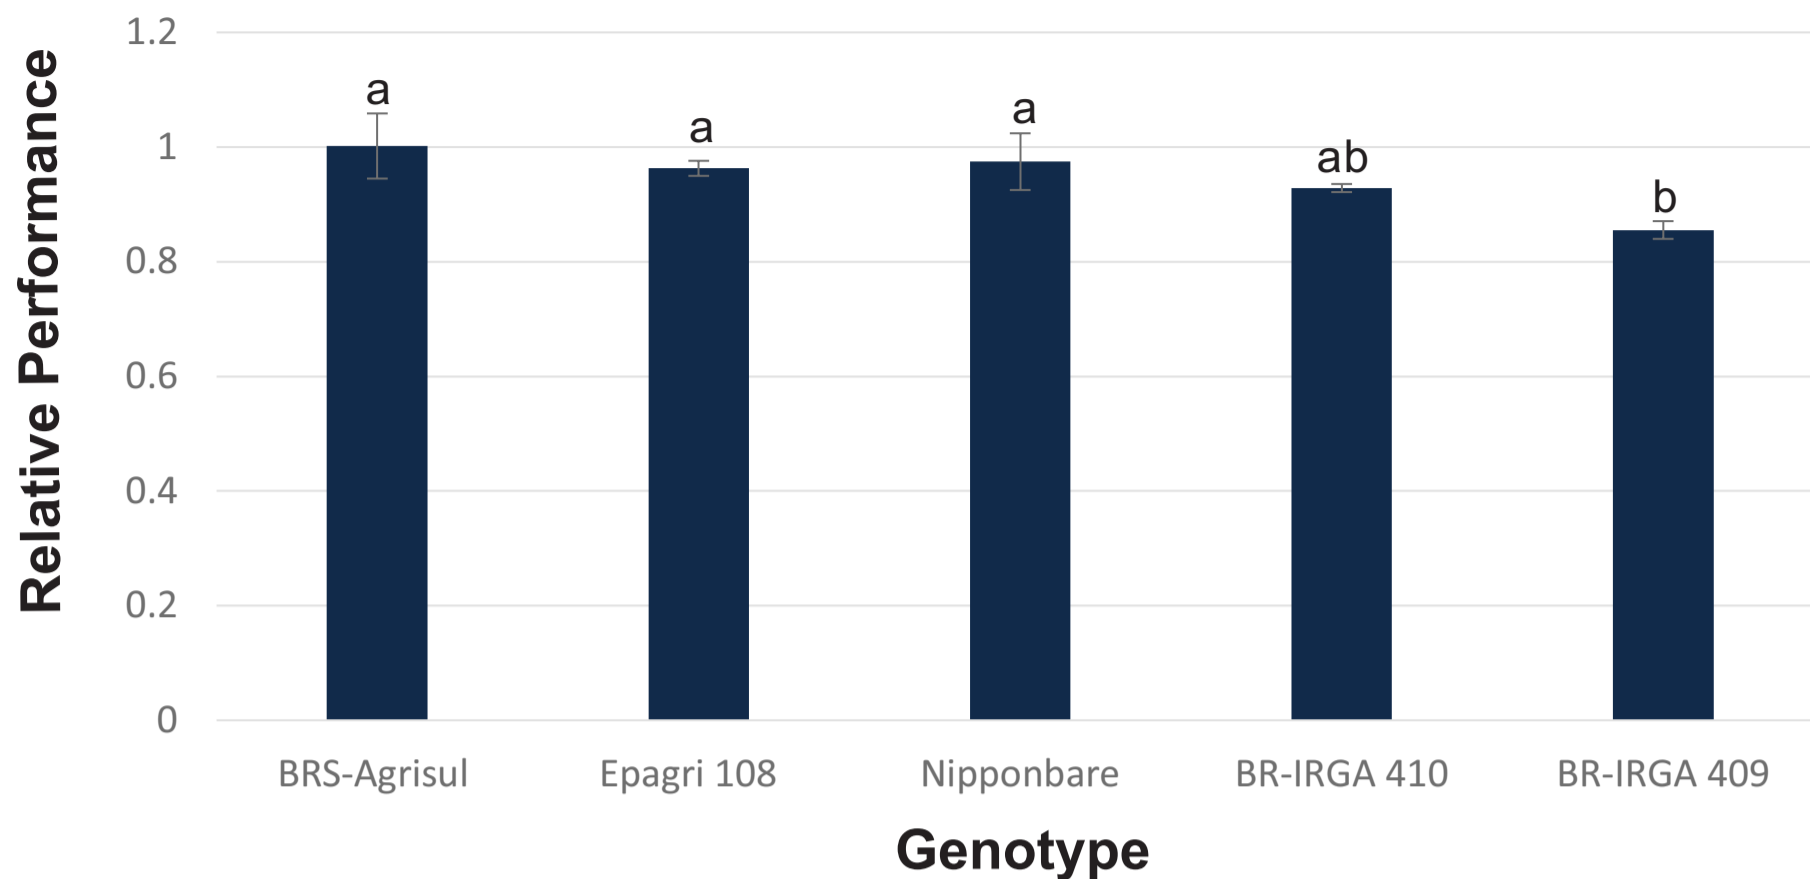

### (b) Micronutrient content of each genotype

based on the values of each repetition used in figure 2

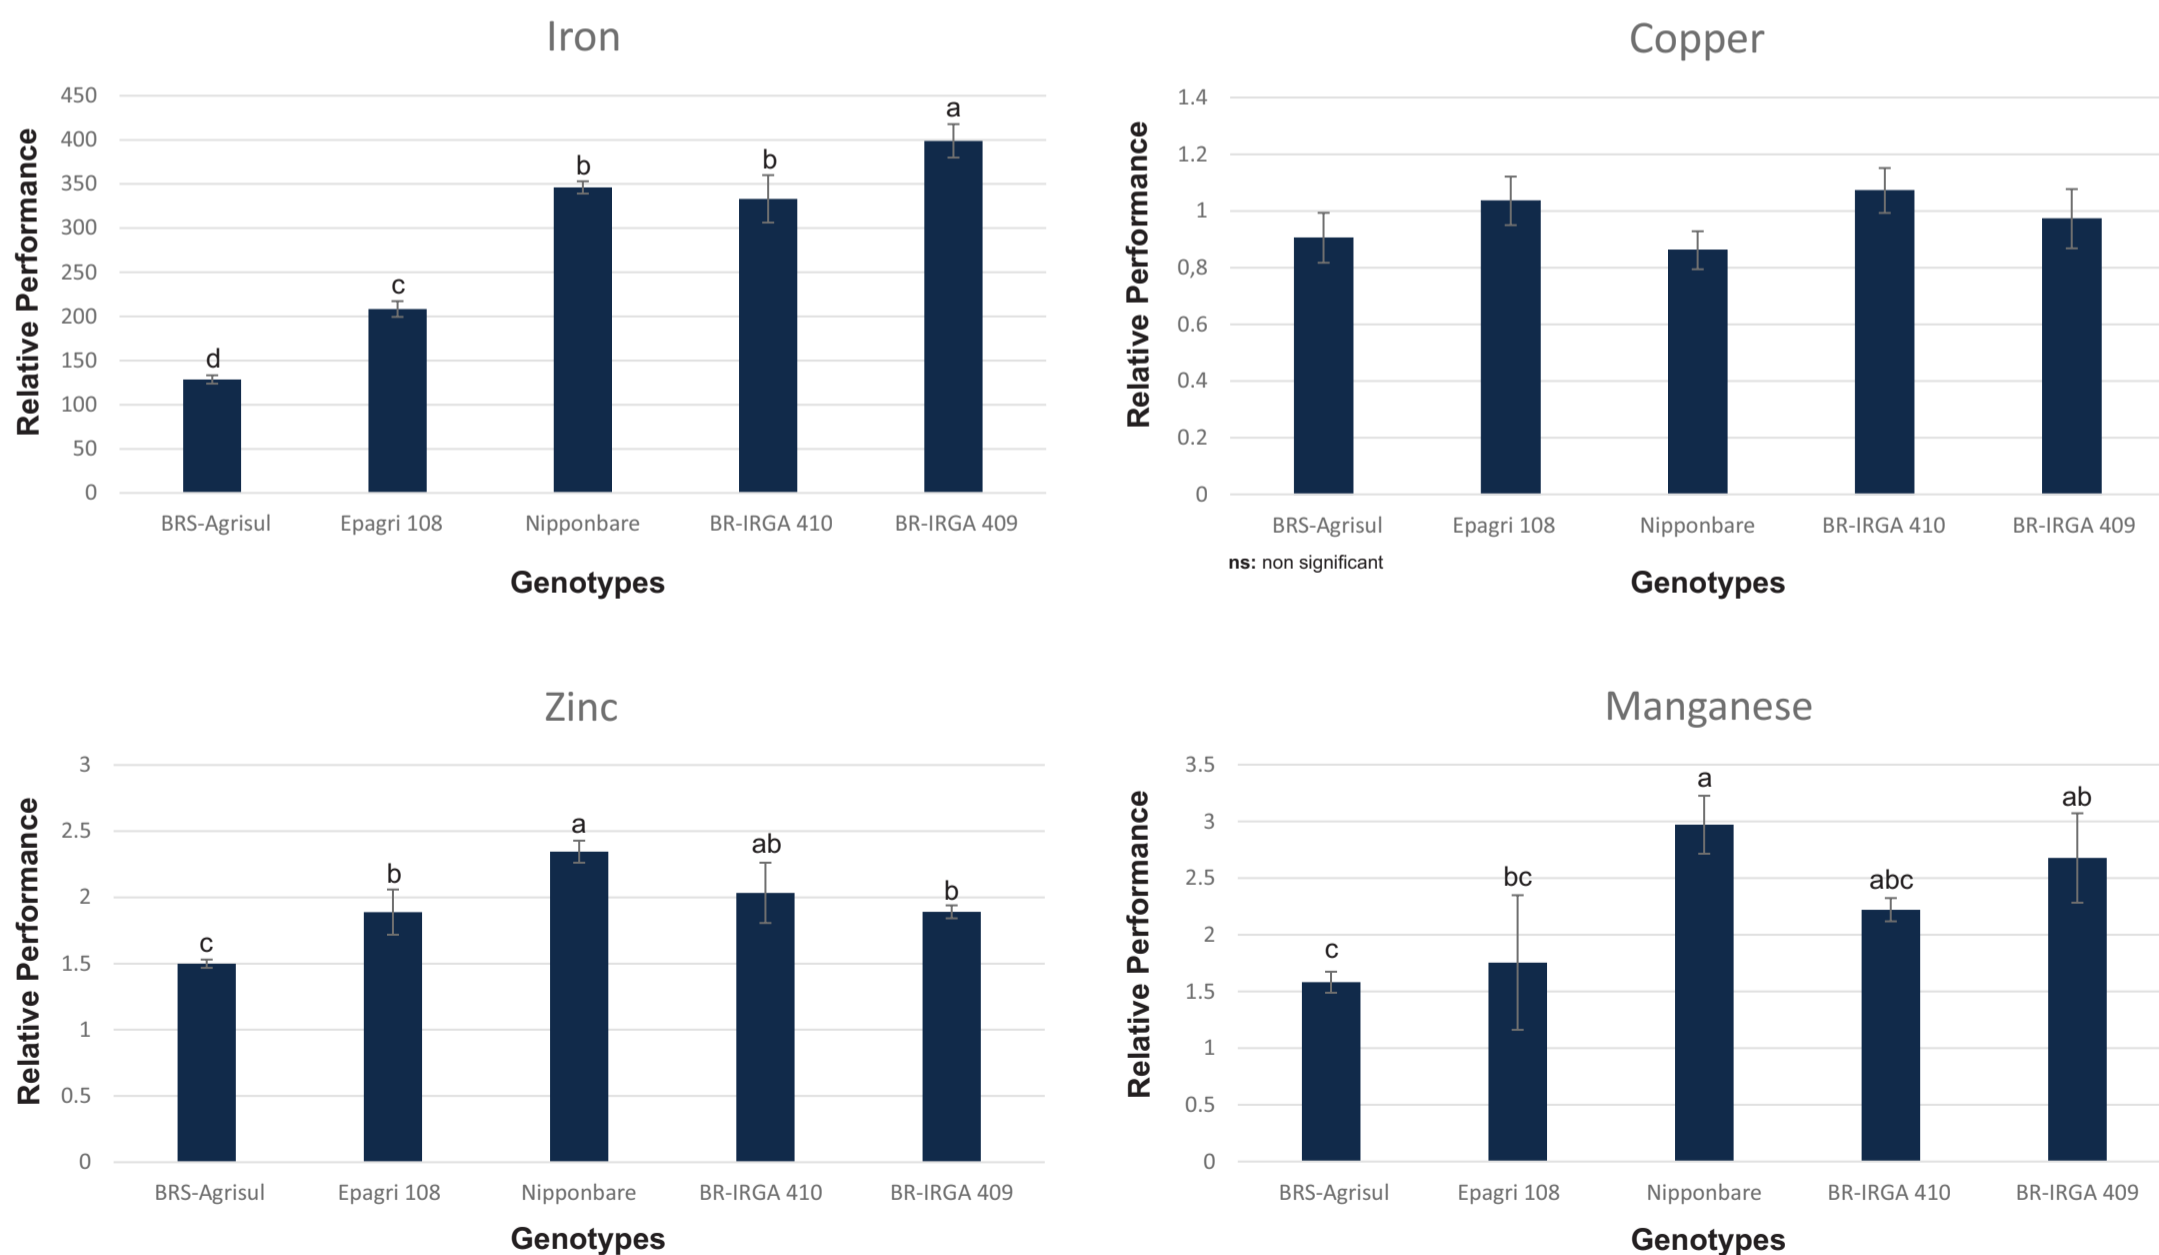

**Figure S1.** Relative performance obtained by the division of the values of plants under stress by the values of the control treatment. Columns followed by the same letters do not differ significantly (Tukey's pairwise comparisons,  $p < 0.05$ ).
